# Supplementary material
Source: PubMed Central journal article supplement (PMC7720677)
Supplement: NIHMS1647341-supplement-Supplemental_figures_tables.pdf [file NIHMS1647341-supplement-Supplemental_figures_tables.pdf]

**Supplementary Figure 1** - PCNA-GFP activity in pouch and hinge of the 3rd instar wing imaginal disc for the genotypes marked. The wing pouch surrounds the hinge, which is marked with a white arrow. PCNA-GFP is shown in green and DNA in red. All scale bars represent 50um.

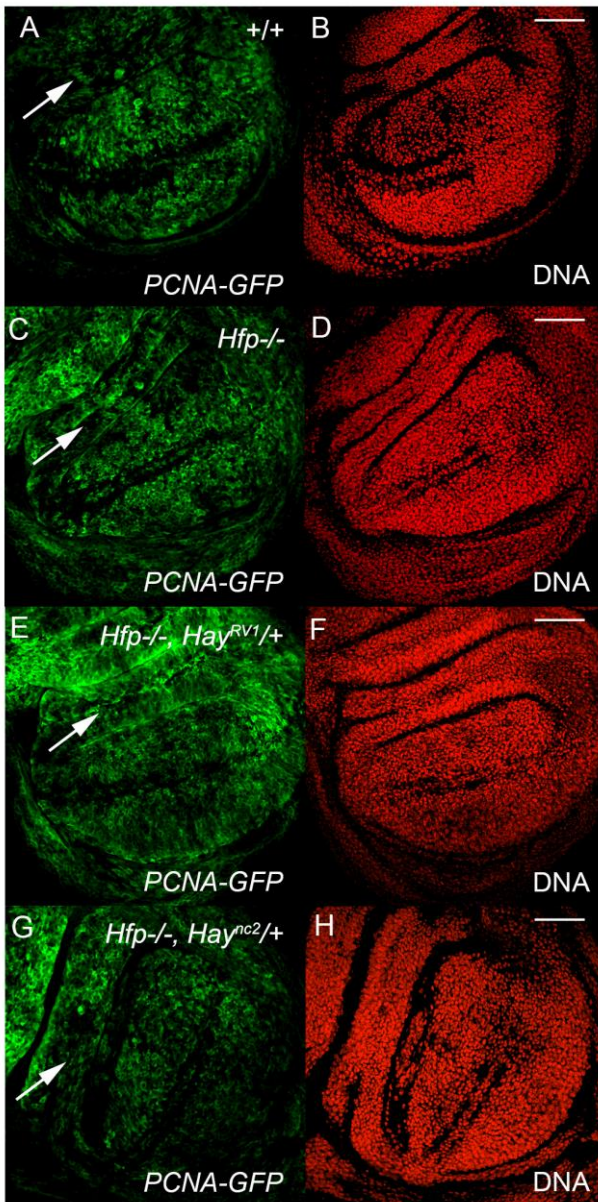

**Supplementary Figure 2** - ddPCR to measure **A** - *dMYC* and **B** - *Hfp* mRNA abundance for the genotypes marked. Statistical tests were performed with Graphpad Prism 6 using unpaired 2-tailed t-test with 95% confidence interval. Error bars represent SEM and according to the Graphpad classification of significance points \* is significant (p=0.01 to 0.05), \*\* is very significant p=0.001 to 0.01, \*\*\* extremely significant (p=0.0001 to 0.001) and \*\*\*\* extremely significant (p<0.0001). See supplementary Table 7 for mean, SEM and biological replicates.

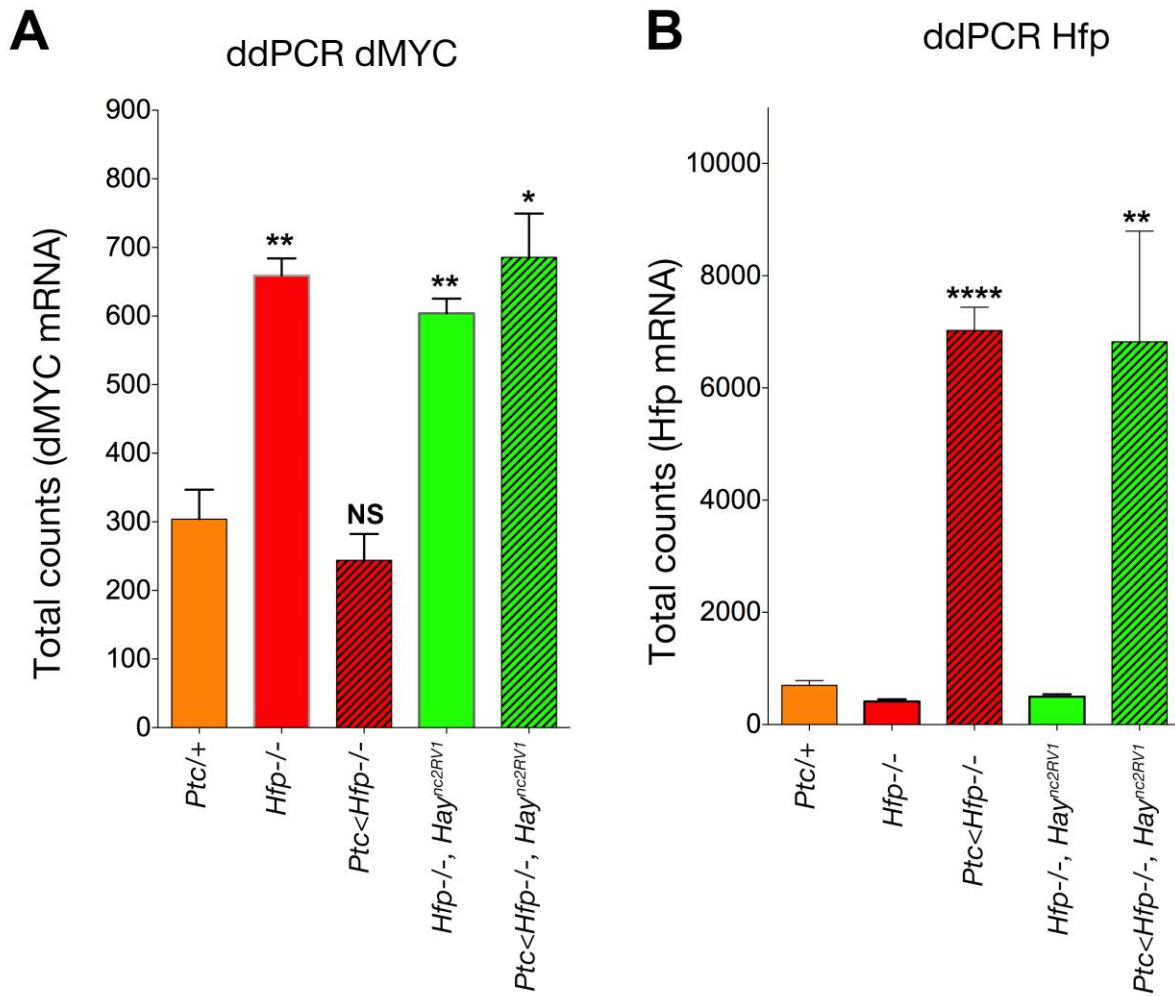

**Supplementary Table 1** - Quantification of larval area (from Figure 1). Mean pixel area ( $\pm$  SEM) for each genotype.

| <b>Genotype</b>                                          | <b>larval area pixels</b> | <b>SEM</b> | <b>n</b> |
|----------------------------------------------------------|---------------------------|------------|----------|
| <i>w1118</i>                                             | 101665                    | 1100       | 9        |
| <i>Hfp</i> -/ -                                          | 125928                    | 2870       | 10       |
| <i>Hfp</i> -/ -, <i>Hay</i> <sup><i>nc2RV1</i></sup> / + | 157333                    | 5068       | 11       |
| <i>Hfp</i> -/ -, <i>Hay</i> <sup><i>nc2RV3</i></sup> / + | 157912                    | 3233       | 6        |
| <i>Hfp</i> -/ -, <i>Hay</i> <sup><i>nc2RV7</i></sup> / + | 161613                    | 3472       | 7        |
| <i>Hfp</i> -/ -, <i>Hay</i> <sup><i>nc2</i></sup> / +    | 103516                    | 4206       | 7        |

**Supplementary Table 2** - Quantification of mitoses in the wing pouch and hinge region (from Figure 1).

| <b>Genotype</b>                                          | <b>PH3</b> | <b>SEM</b> | <b>n</b> |
|----------------------------------------------------------|------------|------------|----------|
| <i>w1118</i>                                             | 140.7      | 7.0        | 13       |
| <i>Hfp</i> -/ -                                          | 175.0      | 9.6        | 14       |
| <i>Hay</i> <sup><i>nc2RV1</i></sup> / +                  | 129.8      | 2.9        | 9        |
| <i>Hfp</i> -/ -, <i>Hay</i> <sup><i>nc2RV1</i></sup> / + | 212.9      | 8.9        | 15       |
| <i>Hay</i> <sup><i>nc2</i></sup> / +                     | 141.4      | 6.4        | 11       |
| <i>Hfp</i> -/ -, <i>Hay</i> <sup><i>nc2</i></sup> / +    | 114.1      | 3.8        | 8        |
| <i>Hay</i> <sup><i>nc2RV7</i></sup> / +                  | 120.7      | 5.6        | 7        |
| <i>Hfp</i> -/ -, <i>Hay</i> <sup><i>nc2RV7</i></sup> / + | 226.1      | 15.9       | 8        |
| <i>Hay</i> <sup><i>pBac</i></sup> / +                    | 130.2      | 4.7        | 9        |
| <i>Hfp</i> -/ -, <i>Hay</i> <sup><i>pBac</i></sup> / +   | 115.5      | 4.3        | 6        |

**Supplementary Table 3** - Quantification of *dMYC-lacZ* activity (from Figure 2).

| Genotype                                                 | B-gal total | SEM   | n | B-gal ZNC | SEM   | n |
|----------------------------------------------------------|-------------|-------|---|-----------|-------|---|
| <i>w1118</i>                                             | 888.3       | 86.74 | 6 | 108.8     | 30.52 | 5 |
| <i>Hfp</i> -/ -                                          | 1462        | 61.74 | 6 | 216.0     | 23.16 | 4 |
| <i>Hfp</i> -/ -, <i>Hay</i> <sup><i>nc2RV1</i></sup> / + | 1794        | 70.69 | 7 | 213.4     | 12.75 | 7 |
| <i>Hfp</i> -/ -, <i>Hay</i> <sup><i>nc2</i></sup> / +    | 969.4       | 67.57 | 6 | 78.35     | 18.31 | 4 |

**Supplementary Table 4** - ddPCR for *MYC* and *Hfp* mRNA abundance in wing imaginal discs, normalised to tubulin. n= biological replicates for each technical triplicate (from Figure 2).

| Genotype                                                    | ddMYC | SEM  | n | ddHfp | SEM | n |
|-------------------------------------------------------------|-------|------|---|-------|-----|---|
| <i>w1118</i>                                                | 51.7  | 1.1  | 4 | 49.6  | 7.7 | 4 |
| <i>Hfp</i> -/ -                                             | 96.5  | 6.5  | 3 | 21.2  | 1.5 | 4 |
| <i>Hay</i> <sup><i>nc2RV1</i></sup> / +                     | 52.4  | 5.2  | 3 | 45.5  | 7.4 | 3 |
| <i>Hfp</i> -/ -,<br><i>Hay</i> <sup><i>nc2RV1</i></sup> / + | 99.0  | 12.8 | 4 | 15.5  | 1.6 | 3 |
| <i>Hay</i> <sup><i>nc2</i></sup> / +                        | 30.1  | 0.9  | 4 | 38.1  | 3.2 | 3 |
| <i>Hfp</i> -/ -, <i>Hay</i> <sup><i>nc2</i></sup> / +       | 57.1  | 3.6  | 3 | 21.2  | 1.5 | 3 |
| <i>Hay</i> <sup><i>pBac</i></sup> / +                       | 43.3  | 2.4  | 3 | 54.0  | 2.6 | 3 |
| <i>Hfp</i> -/ -,<br><i>Hay</i> <sup><i>pBac</i></sup> / +   | 57.8  | 4.0  | 3 | 24.8  | 0.6 | 3 |

**Supplementary Table 5** - Quantification of PCNA-GFP activity in pouch and hinge (from Figure 3). The relative intensity of GFP (mean pixel intensity  $\pm$  SEM) is shown for each genotype.

| Genotype                                                 | PCNA  | SEM   | n  |
|----------------------------------------------------------|-------|-------|----|
| <i>w1118</i>                                             | 695.2 | 85.44 | 5  |
| <i>Hfp</i> -/ -                                          | 1175  | 111.0 | 5  |
| <i>Hfp</i> -/ -, <i>Hay</i> <sup><i>nc2RV1</i></sup> / + | 1634  | 69.12 | 10 |
| <i>Hfp</i> -/ -, <i>Hay</i> <sup><i>nc2</i></sup> / +    | 713.5 | 78.63 | 6  |

**Supplementary Table 6** - Quantification of S phase using BrdU (from Figure 3). Number of BrdU positive cells ( $\pm$  SEM) for each genotype.

| Genotype                                               | BrdU   | SEM    | n  |
|--------------------------------------------------------|--------|--------|----|
| <i>w1118</i>                                           | 340.44 | 18.550 | 10 |
| <i>Hfp</i> -/-                                         | 459.62 | 19.840 | 10 |
| <i>Hfp</i> -/-, <i>Hay</i> <sup><i>nc2RV1</i></sup> /+ | 553.27 | 25.430 | 10 |
| <i>Hfp</i> -/-, <i>Hay</i> <sup><i>nc2</i></sup> /+    | 341.73 | 26.300 | 8  |

**Supplementary Table 7** - ddPCR to measure *dMYC* and *Hfp* mRNA abundance for the genotypes marked. n= biological replicates for each technical triplicate.

| Genotype                                                                   | ddMYC | SEM | n | ddHfp | SEM  | n |
|----------------------------------------------------------------------------|-------|-----|---|-------|------|---|
| <i>Ptc-Gal4</i> /+                                                         | 304   | 43  | 6 | 698   | 84   | 3 |
| <i>Hfp</i> -/-                                                             | 659   | 25  | 3 | 411   | 41   | 3 |
| <i>Ptc-Gal4</i> /+, <i>Hfp</i> -/-                                         | 244   | 38  | 3 | 7025  | 415  | 3 |
| <i>Hfp</i> -/-, <i>Hay</i> <sup><i>nc2RV1</i></sup> /+                     | 604   | 21  | 3 | 498   | 40   | 3 |
| <i>Ptc-Gal4</i> /+, <i>Hfp</i> -/-, <i>Hay</i> <sup><i>nc2RV1</i></sup> /+ | 686   | 64  | 3 | 6822  | 1973 | 3 |

**Supplementary Table 8** - Quantification of larval area (from Figure 4). Mean pixel area ( $\pm$  SEM) for each genotype.

| Genotype                                       | larval area | SEM   | n  |
|------------------------------------------------|-------------|-------|----|
| <i>Arm</i> /+                                  | 100533      | 1423  | 6  |
| <i>w1118</i>                                   | 101665      | 1100  | 9  |
| <i>Hfp</i> EP                                  | 125928      | 2870  | 10 |
| <i>Arm</i> < <i>Hfp</i> EP                     | 113450      | 4907  | 6  |
| <i>Hfp</i> EP, <i>Hay</i> RV1                  | 157333      | 5068  | 11 |
| <i>Arm</i> < <i>Hfp</i> EP, <i>Hay</i> RV1     | 134980      | 3969  | 6  |
| <i>dm</i> P0/+                                 | 88149       | 2792  | 9  |
| <i>dm</i> P0/+; <i>Hfp</i> -/-                 | 89277       | 10052 | 10 |
| <i>dm</i> P0/+; <i>Hay</i> RV1                 | 103398      | 4325  | 8  |
| <i>dm</i> P0/+; <i>Hfp</i> -/-, <i>Hay</i> RV1 | 106722      | 2652  | 9  |

**Supplementary Table 9** - ddPCR to measure *dMYC* for the genotypes marked (from Figure 4). n= biological replicates.

| Genotype                                                                                      | ddMYC | SEM   | n |
|-----------------------------------------------------------------------------------------------|-------|-------|---|
| + / +                                                                                         | 51.70 | 1.13  | 4 |
| <i>Hfp</i> - / -                                                                              | 96.53 | 6.50  | 3 |
| <i>Hay</i> <sup><i>nc2RV1</i></sup> / +                                                       | 52.40 | 5.17  | 3 |
| <i>Hfp</i> - / -, <i>Hay</i> <sup><i>nc2RV1</i></sup> / +                                     | 99.03 | 12.76 | 4 |
| <i>dm</i> <sup><i>p0</i></sup> / +                                                            | 18.88 | 3.02  | 4 |
| <i>dm</i> <sup><i>p0</i></sup> / +; <i>Hfp</i> - / -                                          | 44.41 | 9.00  | 4 |
| <i>dm</i> <sup><i>p0</i></sup> / +; <i>Hay</i> <sup><i>nc2RV1</i></sup> / +                   | 23.42 | 7.65  | 4 |
| <i>dm</i> <sup><i>p0</i></sup> / +; <i>Hfp</i> - / -, <i>Hay</i> <sup><i>nc2RV1</i></sup> / + | 42.11 | 12.0  | 4 |

**Supplementary Table 10** - Quantification of mitoses in the wing pouch and hinge region following the *dMYC* rescue (from Figure 4).

| Genotype                                                                   | PH3   | SEM  | n  |
|----------------------------------------------------------------------------|-------|------|----|
| + / +                                                                      | 140.7 | 7.0  | 13 |
| <i>dm</i> - / +                                                            | 142.4 | 4.8  | 6  |
| <i>Hfp</i> - / -                                                           | 175.0 | 9.6  | 14 |
| <i>dm</i> - / +; <i>Hfp</i> - / -                                          | 138.0 | 6.2  | 8  |
| <i>Hay</i> <sup><i>nc2RV1</i></sup> / +                                    | 129.8 | 2.9  | 9  |
| <i>dm</i> - / +; <i>Hay</i> <sup><i>nc2RV1</i></sup> / +                   | 121.8 | 10.1 | 9  |
| <i>Hfp</i> - / -, <i>Hay</i> <sup><i>nc2RV1</i></sup> / +                  | 212.9 | 8.9  | 15 |
| <i>dm</i> - / +; <i>Hfp</i> - / -, <i>Hay</i> <sup><i>nc2RV1</i></sup> / + | 128.2 | 9.0  | 16 |
| <i>Hay</i> <sup><i>nc2</i></sup> / +                                       | 141.4 | 6.4  | 11 |
| <i>dm</i> - / +; <i>Hay</i> <sup><i>nc2</i></sup> / +                      | 138.8 | 7.3  | 7  |
| <i>Hfp</i> - / -, <i>Hay</i> <sup><i>nc2</i></sup> / +                     | 114.1 | 3.8  | 8  |
| <i>dm</i> - / +; <i>Hfp</i> - / -, <i>Hay</i> <sup><i>nc2</i></sup> / +    | 125.8 | 5.4  | 6  |

**Supplementary Table 11** - ChIP for Ser 5 RNA Pol II followed by qPCR with amplicons proximal to the *dMYC* TSS for genotypes as marked (from Figure 5). n= biological replicates for each technical triplicate.

| <b>Genotype</b>                                  | <b>Amplicon</b> | <b>% Ser5</b> | <b>SEM</b> | <b>n</b> |
|--------------------------------------------------|-----------------|---------------|------------|----------|
| <i>w1118</i>                                     | <i>MYC1</i>     | 0.368         | 0.07       | 4        |
| <i>Hfp</i> -/ -                                  |                 | 0.393         | 0.11       | 3        |
| <i>Hay<sup>nc2RV1</sup></i> / +                  |                 | 0.230         | 0.04       | 4        |
| <i>Hfp</i> -/ -, <i>Hay<sup>nc2RV1</sup></i> / + |                 | 0.330         | 0.04       | 3        |
| <i>Hay<sup>nc2</sup></i> / +                     |                 | 0.218         | 0.03       | 3        |
| <i>Hfp</i> -/ -, <i>Hay<sup>nc2</sup></i> / +    |                 | 0.313         | 0.03       | 3        |
| <i>Mock IP</i>                                   |                 | 0.077         | 0.02       | 5        |
| <i>w1118</i>                                     | <i>MYC2</i>     | 4.890         | 0.29       | 6        |
| <i>Hfp</i> -/ -                                  |                 | 3.018         | 0.44       | 5        |
| <i>Hay<sup>nc2RV1</sup></i> / +                  |                 | 0.658         | 0.12       | 3        |
| <i>Hfp</i> -/ -, <i>Hay<sup>nc2RV1</sup></i> / + |                 | 1.462         | 0.05       | 3        |
| <i>Hay<sup>nc2</sup></i> / +                     |                 | 1.147         | 0.05       | 3        |
| <i>Hfp</i> -/ -, <i>Hay<sup>nc2</sup></i> / +    |                 | 0.749         | 0.05       | 3        |
| <i>Mock IP</i>                                   |                 | 0.063         | 0.01       | 6        |
| <i>w1118</i>                                     | <i>MYC3</i>     | 0.808         | 0.04       | 4        |
| <i>Hfp</i> -/ -                                  |                 | 1.147         | 0.17       | 4        |
| <i>Hay<sup>nc2RV1</sup></i> / +                  |                 | 0.310         | 0.05       | 4        |
| <i>Hfp</i> -/ -, <i>Hay<sup>nc2RV1</sup></i> / + |                 | 0.642         | 0.11       | 3        |
| <i>Hay<sup>nc2</sup></i> / +                     |                 | 0.322         | 0.04       | 3        |
| <i>Hfp</i> -/ -, <i>Hay<sup>nc2</sup></i> / +    |                 | 0.478         | 0.02       | 3        |
| <i>Mock IP</i>                                   |                 | 0.065         | 0.02       | 6        |
| <i>w1118</i>                                     | <i>MYC4</i>     | 1.109         | 0.07       | 3        |
| <i>Hfp</i> -/ -                                  |                 | 0.930         | 0.16       | 4        |
| <i>Hay<sup>nc2RV1</sup></i> / +                  |                 | 0.305         | 0.08       | 4        |
| <i>Hfp</i> -/ -, <i>Hay<sup>nc2RV1</sup></i> / + |                 | 0.519         | 0.07       | 3        |
| <i>Hay<sup>nc2</sup></i> / +                     |                 | 0.273         | 0.04       | 3        |
| <i>Hfp</i> -/ -, <i>Hay<sup>nc2</sup></i> / +    |                 | 0.389         | 0.01       | 3        |

|                |       |      |   |
|----------------|-------|------|---|
| <i>Mock IP</i> | 0.065 | 0.01 | 6 |
|----------------|-------|------|---|

**Supplementary Table 12** - ChIP for Total RNA Pol II followed by qPCR with amplicons proximal to the dMYC TSS for genotypes as marked (from Figure 5). n= biological replicates for each technical triplicate.

| Genotype                                               | Amplicon    | % Pol II | SEM   | n |
|--------------------------------------------------------|-------------|----------|-------|---|
| <i>w1118</i>                                           | <i>MYC1</i> | 0.213    | 0.052 | 3 |
| <i>Hfp</i> -/-                                         |             | 0.189    | 0.013 | 3 |
| <i>Hay</i> <sup><i>nc2RV1</i></sup> /+                 |             | 0.123    | 0.008 | 3 |
| <i>Hfp</i> -/-, <i>Hay</i> <sup><i>nc2RV1</i></sup> /+ |             | 0.188    | 0.032 | 4 |
| <i>Hay</i> <sup><i>nc2</i></sup> /+                    |             | 0.522    | 0.040 | 3 |
| <i>Hfp</i> -/-, <i>Hay</i> <sup><i>nc2</i></sup> /+    |             | 0.182    | 0.048 | 5 |
| <i>w1118</i>                                           | <i>MYC2</i> | 1.000    | NA    | 3 |
| <i>Hfp</i> -/-                                         |             | 0.678    | 0.058 | 3 |
| <i>Hay</i> <sup><i>nc2RV1</i></sup> /+                 |             | 0.427    | 0.008 | 3 |
| <i>Hfp</i> -/-, <i>Hay</i> <sup><i>nc2RV1</i></sup> /+ |             | 0.322    | 0.006 | 4 |
| <i>Hay</i> <sup><i>nc2</i></sup> /+                    |             | 0.912    | 0.034 | 3 |
| <i>Hfp</i> -/-, <i>Hay</i> <sup><i>nc2</i></sup> /+    |             | 0.793    | 0.100 | 5 |
| <i>w1118</i>                                           | <i>MYC3</i> | 0.325    | 0.029 | 3 |
| <i>Hfp</i> -/-                                         |             | 0.202    | 0.025 | 3 |
| <i>Hay</i> <sup><i>nc2RV1</i></sup> /+                 |             | 0.109    | 0.015 | 3 |
| <i>Hfp</i> -/-, <i>Hay</i> <sup><i>nc2RV1</i></sup> /+ |             | 0.097    | 0.008 | 4 |
| <i>Hay</i> <sup><i>nc2</i></sup> /+                    |             | 0.290    | 0.045 | 3 |
| <i>Hfp</i> -/-, <i>Hay</i> <sup><i>nc2</i></sup> /+    |             | 0.195    | 0.029 | 5 |
| <i>w1118</i>                                           | <i>MYC4</i> | 0.283    | 0.053 | 3 |
| <i>Hfp</i> -/-                                         |             | 0.191    | 0.044 | 3 |
| <i>Hay</i> <sup><i>nc2RV1</i></sup> /+                 |             | 0.084    | 0.012 | 3 |
| <i>Hfp</i> -/-, <i>Hay</i> <sup><i>nc2RV1</i></sup> /+ |             | 0.084    | 0.012 | 4 |
| <i>Hay</i> <sup><i>nc2</i></sup> /+                    |             | 0.213    | 0.012 | 3 |
| <i>Hfp</i> -/-, <i>Hay</i> <sup><i>nc2</i></sup> /+    |             | 0.160    | 0.030 | 5 |
